# Supplementary material
Source: publisher site journal article supplement (https://www.dovepress.com/article/402025)
Supplement: Supplementary file 1 [file get_supplementary_file.php]

# Is co-occurrence of frailty and multimorbidity associated with increased risk of catastrophic health expenditure? A prospective cohort analysis in China

**Supplementary tables:**

**Table S1** Selection of items to calculate frailty score

**Table S2** Analysis strategy

**Table S3** E-Value Calculation, Related to Table 4 and 5

**Table S1** Selection of items to calculate frailty score

| Items | Categorization |
| --- | --- |
| Physical/ADL/IADL limitations (n=19) |  |
| Difficulty with walking 100 Metres. | 0=did not have any problems with the activity; 1=some difficulty with the activity or could not do the activity. |
| Difficulty with walking 1 KM. |
| Difficulty with controlling urination and defecation. |
| Difficulty with getting up from chair after sitting for long periods. |
| Difficulty with climbing several flights of stairs without resting. |
| Difficulty with stooping, kneeling,or crouching. |
| Difficulty with reaching or extending arms above shoulder level. |
| Difficulty with lifting or carrying weights over 10 Jin (5kg). |
| Difficulty with picking up a small coin from a table. |
| Difficulty with dressing. |
| Difficulty with bathing or showering. |
| Difficulty with eating. |
| Difficulty with getting out of bed and walking. |
| Difficulty with using the toilet, including getting up or down. |
| Difficulty with managing money. |
| Difficulty with taking medications. |
| Difficulty with shopping for groceries. |
| Difficulty with preparing a hot meal. |
| Difficulty with cleaning house. |
| CES-D (n=10) |  |
| Felt depressed much of the time during the past week. | 0=Rarely or none of the time; 1= Some or a little of the time/ Occasionally or a moderate amount of the time/ Most or all of the time. |
| Felt sleep was restless. |
| Was not happy most of the time. |
| Felt lonely. |
| Bothered by little things. |
| Could not get going. |
| Had trouble keeping mind on what is doing. |
| Felt fearful. |
| Felt everything they did during the past week was an effort. | 0=Most or all of the time; 1=Some or a little of the time/ Occasionally or a moderate amount of the time/ Rarely or none of the time. |
| Felt hopeful about the future. |
| Cognition (n=4) |  |
| Cannot answer correct day of the month given. | 0=can correctly answer; 1=cannot correctly answer. |
| Cannot answer correct month given. |
| Cannot answer correct year given. |
| Cannot answer correct day given. |
| Others (n=1) |  |
| Self reported health. | 0=very good/ good; 1=fair/ poor/ very poor. |

**Table S2** Analysis strategy

| **Aim** | **Exposure** | **Reference group** | **Model** |
| --- | --- | --- | --- |
| To evaluate independent effect of frailty or chronic conditions on CHE | Frailty:  0=non-frailty; 1=frailty | Non-frailty | MSM |
| Multimorbidity condition:  0=without chronic diseases; 1=single chronic disease; 2= multimorbidity. | Without chronic disease | MSM |
| To evaluate effects of co-occurrence of frailty and chronic conditions on CHE | Co-occurrence:  1=Single chronic disease but not frail; 2=Multimorbidity but not frail; 3=Frailty without chronic diseases; 4=Frailty with single chronic disease; 5=Frailty with multimorbidity. | Non-frailty and without chronic disease | Time-varying Cox regression |
| To evaluate effects of frailty co-occurring with chronic diseases on CHE | Co-occurrence:  1=Frailty without chronic diseases; 2=Frailty with single chronic disease; 3=Frailty with multimorbidity. | Frailty and without chronic disease | Time-varying Cox regression |
| To evaluate effect of multimorbidity co-occurring with frailty on CHE | Co-occurrence:  1=Multimorbidity but not frail;  2=Frailty with multimorbidity. | Multimorbidity and without frailty | Time-varying Cox regression |

CHE,catastrophic health expenditure; MSM, marginal structural model.

**Table S3** E-Value Calculation, Related to Table 3 and 4

|  | HR | 95%CI | P value | E-value |
| --- | --- | --- | --- | --- |
| **MSM (Table 3)** |  |  |  |  |
| **Multimorbidity (ref. Without chronic diseases)** |  |  |  |  |
| Single chronic disease | 1.26 | 1.13 to 1.40 | <0.001 | 1.63 |
| Multimorbidity | 1.8 | 1.63 to 1.99 | <0.001 | 2.37 |
| **Frailty (ref. Not frail)** |  |  |  |  |
| Frailty | 1.32 | 1.21 to 1.45 | <0.001 | 1.72 |
| **Time varying Cox regression (Table 4)** |  |  |  |  |
| **Ref. Group: without frailty and chronic diseases** |  |  |  |  |
| Single chronic disease | 1.23 | 1.08 to 1.39 | 0.001 | 1.58 |
| Multimorbidity | 1.6 | 1.42 to 1.81 | <0.001 | 2.11 |
| Frailty | 1.11 | 0.90 to 1.35 | 0.331 | 1.36 |
| Frailty & single chronic disease | 1.42 | 1.21 to 1.67 | <0.001 | 1.87 |
| Frailty & multimorbidity | 2.11 | 1.86 to 2.38 | <0.001 | 2.73 |
| **Ref. Group: with frailty but without chronic diseases** |  |  |  |  |
| Without frailty and chronic diseases | 0.9 | 0.74 to 1.22 | 0.331 | 1.36 |
| Single chronic disease | 1.11 | 0.91 to 1.36 | 0.307 | 1.36 |
| Multimorbidity | 1.45 | 1.19 to 1.77 | <0.001 | 1.91 |
| Frailty & single chronic disease | 1.28 | 1.03 to 1.60 | 0.027 | 1.66 |
| Frailty & multimorbidity | 1.91 | 1.56 to 2.32 | <0.001 | 2.5 |
| **Ref. Group: with Multimorbidity but without frailty** |  |  |  |  |
| Without frailty and chronic diseases | 0.62 | 0.55 to 0.70 | <0.001 | 2.13 |
| Single chronic disease | 0.77 | 0.68 to 0.86 | <0.001 | 1.69 |
| Frailty | 0.69 | 0.57 to 0.84 | <0.001 | 1.91 |
| Frailty & single chronic disease | 0.89 | 0.76 to 1.04 | 0.129 | 1.39 |
| Frailty & multimorbidity | 1.32 | 1.17 to 1.48 | <0.001 | 1.72 |

MSM, marginal structural model; HR, hazard ratio; CI, Confidence Interval.
